# Supplementary material for: Clinical Utilization Pattern of Liquid Biopsies (LB) to Detect Actionable Driver Mutations, Guide Treatment Decisions and Monitor Disease Burden During Treatment of 33 Metastatic Colorectal Cancer (mCRC) Patients (pts) at a Fox Chase Cancer Center GI Oncology Subspecialty Clinic
Source: Front Oncol. 2019 Jan 17;8:652. doi: 10.3389/fonc.2018.00652 (PMC6344461; doi:10.3389/fonc.2018.00652)
Supplement: Supplementary file 1 [file Table_1.XLSX]

## Sheet: Sheet1
Patient number	maxpct	number of alts	gene	alteration	percentage	copy number	type	mutation type
1	53.2	10	APC	L779*	53.2	NA	SNV	nonsense
			APC	S2497L	0.11	NA	SNV	missense
			BRAF	AMP	0	2.39544	CNV	amp
			BRAF	E26A	0.76	NA	SNV	missense
			BRCA2	E1126*	0.42	NA	SNV	nonsense
			EGFR	AMP	0	2.24564	CNV	amp
			FGFR1	AMP	0	2.75644	CNV	amp
			KRAS	G12V	37.19	NA	SNV	missense
			MYC	AMP	0	2.45066	CNV	amp
			TP53	C242Y	45.33	NA	SNV	missense
2	2.48	11	AKT1	E17K	0.61	NA	SNV	splice
			APC	S1321S	1.18	NA	SNV	synonymous
			ARID1A	R1845W	2.48	NA	SNV	missense
			CCNE1	A214V	1.3	NA	SNV	missense
			CDH1	A408A	0.75	NA	SNV	synonymous
			EGFR	A508V	0.86	NA	SNV	missense
			EGFR	S768S	0.37	NA	SNV	synonymous
			ERBB2	G1038C	1.13	NA	SNV	missense
			FGFR1	V758M	0.63	NA	SNV	missense
			MAP2K1	A132A	1.25	NA	SNV	synonymous
			TP53	R273H	0.54	NA	SNV	missense
3	0.55	4	FGFR2	P263P	0.1	NA	SNV	synonymous
			KRAS	G12D	0.49	NA	SNV	missense
			RB1	K928R	0.48	NA	SNV	missense
			TP53	H179R	0.55	NA	SNV	missense
3	10.91	6	APC	p.Met200fs	3.49918	NA	INDEL	indel
			KRAS	G12D	6.46291	NA	SNV	missense
			PIK3CA	E545K	3.55531	NA	SNV	missense
			RB1	K928R	10.9104	NA	SNV	missense
			SMAD4	L414*	9.36329	NA	SNV	nonsense
			TP53	H179R	8.24662	NA	SNV	missense
4	17.65	6	AKT1	E17K	17.65	NA	SNV	splice
			APC	M1413I	9.67	NA	SNV	missense
			APC	R919*	9.46	NA	SNV	nonsense
			APC	V1414*	9.72	NA	SNV	nonsense
			KRAS	G13D	7.87	NA	SNV	missense
			TP53	R175H	10.5	NA	SNV	missense
5	0.56	1	TP53	Y126*	0.56	NA	SNV	splice
5	0.763315	1	TP53	Y126*	0.763315	NA	SNV	splice
6	12.47	9	APC	K2524E	0.19	NA	SNV	missense
			AR	AMP	0	2.39097	CNV	amp
			BRAF	AMP	0	2.24111	CNV	amp
			EGFR	AMP	0	2.25225	CNV	amp
			KRAS	G12V	9.28	NA	SNV	missense
			NF1	R2594H	0.11	NA	SNV	missense
			PIK3CA	R88Q	0.24	NA	SNV	missense
			RAF1	AMP	0	2.30896	CNV	amp
			SMAD4	G508S	12.47	NA	SNV	missense
6	0.195786	3	APC	K2524E	0.146978	NA	SNV	missense
			FGFR2	NA	0.150865	NA	SNV	splice
			NF1	R2594H	0.195786	NA	SNV	missense
6	0.292734	3	APC	K2524E	0.292734	NA	SNV	missense
			FGFR2	NA	0.128128	NA	SNV	splice
			SMAD4	G508S	0.118888	NA	SNV	missense
6	0.3	3	APC	Q1294fs
			APC	K2624E
			FGFR2	splice site SNV
			NF1	R2594H
7	11.36	5	APC	R216*	3.34	NA	SNV	splice
			EGFR	AMP	0	2.40397	CNV	amp
			FBXW7	G654S	0.12	NA	SNV	missense
			TP53	R248W	11.36	NA	SNV	missense
			TP53	Y220C	0.17	NA	SNV	missense
8	0	0
9	80.29	9	ALK	I1268S	2.2	NA	SNV	missense
			APC	R1450*	80.29	NA	SNV	nonsense
			CDK6	AMP	0	2.57241	CNV	amp
			FGFR2	AMP	0	11.4361	CNV	amp
			KRAS	G12C	0.2	NA	SNV	missense
			KRAS	G12D	30.47	NA	SNV	missense
			RET	P679P	0.13	NA	SNV	synonymous
			SMAD4	R361H	68.5	NA	SNV	missense
			TP53	C242Y	62.57	NA	SNV	missense
10	5.41738	6	APC	E941*	2.52256	NA	SNV	nonsense
			APC	p.Gln757fs	4.37873	NA	INDEL	indel
			EGFR	A647T	0.229268	NA	SNV	missense
			MTOR	M813V	0.20572	NA	SNV	missense
			MYC	Y212Y	0.219158	NA	SNV	synonymous
			TP53	R273H	5.41738	NA	SNV	missense
10	3.0657	5	APC	E941*	1.68183	NA	SNV	nonsense
			APC	p.Gln757fs	2.32566	NA	INDEL	indel
			EGFR	A647T	0.232323	NA	SNV	missense
			GNAS	R201C	0.548338	NA	SNV	missense
			TP53	R273H	3.0657	NA	SNV	missense
11	61.431	12	APC	Y2S	0.295904	NA	SNV	missense
			APC	p.Ser1465fs	61.431	NA	INDEL	indel
			AR	L548F	0.424936	NA	SNV	missense
			BRAF	AMP	0	2.79801	CNV	amp
			CCND2	AMP	0	3.2884	CNV	amp
			CDK6	AMP	0	2.52462	CNV	amp
			CDKN2A	L104R	0.362909	NA	SNV	missense
			EGFR	AMP	0	2.69546	CNV	amp
			MET	AMP	0	2.64515	CNV	amp
			SMAD4	D351Y	50.7133	NA	SNV	missense
			TP53	G245S	20.5011	NA	SNV	missense
			TP53	R342*	43.6446	NA	SNV	nonsense
12	11.2012	7	AR	P153L	0.169682	NA	SNV	missense
			CCNE1	P78L	10.1437	NA	SNV	missense
			CDH1	p.Pro127fs	11.2012	NA	INDEL	indel
			FGFR1	T340T	0.114516	NA	SNV	synonymous
			KRAS	AMP	0	6.399	CNV	amp
			RAF1	AMP	0	2.29035	CNV	amp
			SMAD4	G510R	8.08234	NA	SNV	missense
13	5.453	10	APC	R564*	2.1231	NA	SNV	nonsense
			APC	p.Leu1488fs	5.43376	NA	INDEL	indel
			AR	Q405H	1.46207	NA	SNV	missense
			KRAS	G12D	5.453	NA	SNV	missense
			KRAS	G13D	1.05911	NA	SNV	missense
			PIK3CA	E545K	0.633948	NA	SNV	missense
			PIK3CA	S306S	0.467015	NA	SNV	synonymous
			PTEN	p.Ser229fs	1.23925	NA	INDEL	indel
			SMAD4	C363F	4.71609	NA	SNV	missense
			TP53	p.Cys182fs	3.30022	NA	INDEL	indel
14	72.9102	5	APC	E1322*	71.2234	NA	SNV	nonsense
			BRAF	AMP	0	2.95491	CNV	amp
			EGFR	AMP	0	2.98811	CNV	amp
			SMAD4	Y133F	2.4838	NA	SNV	missense
			TP53	C238F	72.9102	NA	SNV	missense
14	26.7412	5	APC	E1322*	23.1455	NA	SNV	nonsense
			BRAF	AMP	0	2.32476	CNV	amp
			CDK6	AMP	0	2.22162	CNV	amp
			EGFR	AMP	0	2.32543	CNV	amp
			TP53	C238F	26.7412	NA	SNV	missense
15	11.8747	7	APC	R564*	9.55123	NA	SNV	nonsense
			BRAF	AMP	0	2.23888	CNV	amp
			EGFR	AMP	0	2.22501	CNV	amp
			MAPK1	N154I	2.74155	NA	SNV	missense
			MET	AMP	0	2.19556	CNV	amp
			NRAS	Q61K	11.2753	NA	SNV	missense
			TP53	R158H	11.8747	NA	SNV	missense
16	8.34705	8	APC	p.Glu1309fs	8.34705	NA	INDEL	indel
			EGFR	G465G	3.05535	NA	SNV	synonymous
			EGFR	K479T	2.93838	NA	SNV	missense
			EGFR	N497T	2.63783	NA	SNV	missense
			EGFR	S464L	3.0061	NA	SNV	missense
			IDH1	R132H	0.167026	NA	SNV	missense
			KRAS	Q61H	0.180034	NA	SNV	missense
			TP53	p.Pro177_Cys182del	7.35918	NA	INDEL	indel
17	0	0
18	3.0437	3	APC	E1353*	3.0437	NA	SNV	nonsense
			KRAS	G12C	1.61869	NA	SNV	missense
			TP53	R273H	1.51691	NA	SNV	missense
19	14.8545	3	FGFR1	AMP	0	3.13954	CNV	amp
			MET	AMP	0	2.29183	CNV	amp
			TP53	R248W	14.8545	NA	SNV	missense
20	0.0690135	1	NF1	p.Arg1362fs	0.0690135	NA	INDEL	indel
21	83.8748	10	APC	E418*	60.3019	NA	SNV	nonsense
			APC	Q1378*	20.4375	NA	SNV	nonsense
			AR	Q803R	8.96135	NA	SNV	missense
			CCNE1	AMP	0	2.66538	CNV	amp
			EGFR	AMP	0	3.05957	CNV	amp
			ERBB2	AMP	0	2.72854	CNV	amp
			KRAS	Q61H	1.38739	NA	SNV	missense
			MYC	AMP	0	3.9531	CNV	amp
			PIK3CA	K111E	28.5686	NA	SNV	missense
			TP53	K132R	83.8748	NA	SNV	missense
22	12.281	10	APC	R876*	9.25738	NA	SNV	nonsense
			APC	T1438I	0.358213	NA	SNV	missense
			APC	NA	0.227285	NA	SNV	splice
			ARID1A	K1071N	0.584993	NA	SNV	missense
			CDK6	AMP	0	2.21637	CNV	amp
			FGFR1	T318I	0.207534	NA	SNV	missense
			KRAS	G12D	7.8	NA	SNV	missense
			NF1	splice alt	0.0630525	NA	INDEL	indel
			RB1	splice alt	0.116161	NA	INDEL	indel
			TP53	H179D	12.281	NA	SNV	missense
23	35.6147	13	APC	R213*	25.2771	NA	SNV	nonsense
			AR	AMP	0	1.6974	CNV	amp
			BRAF	AMP	0	2.3498	CNV	amp
			BRCA1	L474V	13.79	NA	SNV	missense
			CDK6	AMP	0	2.29922	CNV	amp
			EGFR	AMP	0	2.5804	CNV	amp
			KRAS	G12V	23.1493	NA	SNV	missense
			MET	AMP	0	2.26398	CNV	amp
			MYC	AMP	0	3.07157	CNV	amp
			PDGFRA	AMP	0	2.39896	CNV	amp
			PDGFRA	K265*	0.181344	NA	SNV	nonsense
			RB1	V243V	0.271496	NA	SNV	synonymous
			TP53	R175H	35.6147	NA	SNV	missense
24	0	0
25	33.3402	4	BRAF	V600E	33.3402	NA	SNV	missense
			FGFR1	AMP	0	2.5512	CNV	amp
			FGFR2	AMP	0	2.41306	CNV	amp
			PIK3CA	L989L	20.2417	NA	SNV	synonymous
26	82.3547	27	APC	A1366A	0.279239	NA	SNV	synonymous
			APC	S2244G	0.419507	NA	SNV	missense
			AR	A372A	0.126753	NA	SNV	synonymous
			AR	T661P	0.101866	NA	SNV	missense
			ARID1A	L2014P	0.228944	NA	SNV	missense
			ARID1A	L2125R	0.156634	NA	SNV	missense
			BRAF	AMP	0	3.20169	CNV	amp
			BRCA2	T3199T	0.330102	NA	SNV	synonymous
			CCNE1	AMP	0	2.38049	CNV	amp
			CDK6	AMP	0	2.80894	CNV	amp
			EGFR	AMP	0	2.88633	CNV	amp
			KRAS	Q61H	0.557574	NA	SNV	missense
			MAP2K1	K57T	0.368506	NA	SNV	missense
			MAP2K2	Y138Y	0.163572	NA	SNV	synonymous
			MET	AMP	0	2.99032	CNV	amp
			MTOR	E447A	0.558168	NA	SNV	missense
			MTOR	F63V	0.17089	NA	SNV	missense
			MTOR	L1484P	0.451075	NA	SNV	missense
			MTOR	p.Lys1466fs	0.0569495	NA	INDEL	indel
			MYC	AMP	0	17.2985	CNV	amp
			NF1	E2641G	0.11063	NA	SNV	missense
			NF1	K2273K	0.290409	NA	SNV	splice
			NOTCH1	L2218P	0.124224	NA	SNV	missense
			NTRK3	T682A	0.149061	NA	SNV	missense
			PIK3CA	V706V	0.293549	NA	SNV	synonymous
			PTEN	L108R	0.298422	NA	SNV	missense
			APC	A1366A	82.3547	NA	SNV	nonsense
27	0.741534	2	KRAS	A146T	0.741534	NA	SNV	missense
			PIK3CA	Q546K	0.312406	NA	SNV	missense
28	19.552	43	APC	p.Lys212fs	16.5125	NA	INDEL	indel
			APC	p.Thr1556fs	15.9216	NA	INDEL	indel
			ARID1A	S745N	1.02034	NA	SNV	missense
			ARID1A	p.Ala339fs	8.05221	NA	INDEL	indel
			BRCA2	H640Y	1.5221	NA	SNV	missense
			BRCA2	p.Thr3033fs	1.44558	NA	INDEL	indel
			BRCA2	p.Val2716fs	0.118178	NA	INDEL	indel
			CDKN2A	G111G	0.481989	NA	SNV	synonymous
			CDKN2A	Y44Y	0.112597	NA	SNV	synonymous
			EGFR	N493D	0.60235	NA	SNV	missense
			EGFR	P373S	0.235563	NA	SNV	missense
			EGFR	Y1172Y	0.181384	NA	SNV	synonymous
			ERBB2	K937R	14.8695	NA	SNV	missense
			ERBB2	R678Q	15.7365	NA	SNV	missense
			FBXW7	H460Y	7.96025	NA	SNV	missense
			FGFR1	R609Q	0.141939	NA	SNV	missense
			FGFR2	K480T	1.56629	NA	SNV	splice
			FGFR2	R203H	14.4864	NA	SNV	missense
			KRAS	A146T	4.50623	NA	SNV	missense
			KRAS	G12V	0.0604936	NA	SNV	missense
			KRAS	G13D	0.324842	NA	SNV	missense
			KRAS	G60R	0.15067	NA	SNV	missense
			KRAS	K117N	0.131948	NA	SNV	missense
			MET	K1219N	0.407058	NA	SNV	missense
			MET	S233P	1.01447	NA	SNV	missense
			MLH1	P437P	0.747993	NA	SNV	synonymous
			MYC	E274D	4.19736	NA	SNV	missense
			NF1	I2176V	1.10077	NA	SNV	missense
			NOTCH1	F170I	0.16841	NA	SNV	missense
			NOTCH1	L2468P	8.85979	NA	SNV	missense
			PIK3CA	E545G	12.6298	NA	SNV	missense
			PTEN	p.Trp274fs	11.9668	NA	INDEL	indel
			PTEN	splice alt	15.1475	NA	INDEL	indel
			RB1	p.Arg418fs	12.332	NA	INDEL	indel
			RET	Y660H	0.55033	NA	SNV	missense
			SMAD4	V354M	0.295706	NA	SNV	missense
			TP53	A161T	0.505572	NA	SNV	missense
			TP53	C176R	0.159513	NA	SNV	missense
			TP53	Q354R	4.44923	NA	SNV	missense
			TP53	R282W	0.405362	NA	SNV	missense
			TP53	p.Lys382fs	19.552	NA	INDEL	indel
			TP53	p.Ser20fs	4.55911	NA	INDEL	indel
			TP53	p.Val73fs	0.106135	NA	INDEL	indel
29	36.9691	4	FBXW7	A503T	32.4332	NA	SNV	missense
			KIT	AMP	0	2.4482	CNV	amp
			PDGFRA	AMP	0	2.56856	CNV	amp
			TP53	R175G	36.9691	NA	SNV	missense
30	35.961	21	PTEN	R233*	35.961	NA	SNV	nonsense
			TP53	NA	35.3176	NA	SNV	splice
			BRAF	V600E	32.038	NA	SNV	missense
			KIT	A404T	26.2386	NA	SNV	missense
			DDR2	R631W	25.6266	NA	SNV	missense
			APC	R1450*	24.4308	NA	SNV	nonsense
			PIK3CA	E545G	23.5787	NA	SNV	missense
			APC	p.Thr1556fs	11.0839	NA	INDEL	indel
			APC	S1995A	0.547665	NA	SNV	missense
			APC	Q1131H	0.449195	NA	SNV	missense
			APC	T39P	0.428506	NA	SNV	missense
			MET	S1254R	0.346908	NA	SNV	missense
			ALK	K1267T	0.265365	NA	SNV	missense
			ARID1A	S1976S	0.218309	NA	SNV	synonymous
			KIT	I805M	0.187673	NA	SNV	missense
			AR	K349R	0.108687	NA	SNV	missense
			NTRK1	K609T	0.104158	NA	SNV	missense
			KRAS	G12V	0.0833504	NA	SNV	missense
			EGFR	AMP	0	2.46729	CNV	amp
			CDK6	AMP	0	2.47227	CNV	amp
			MYC	AMP	0	2.98708	CNV	amp
31	15.15	9	TP53	R306	15.1499	NA	SNV	nonsense
			KRAS	G12D	13.0165	NA	SNV	missense
			MTOR	R132H	12.6655	NA	SNV	missense
			APC	p.Tyr622fs	9.82689	NA	INDEL	indel
			APC	p.Thr1556fs	6.33294	NA	INDEL	indel
			PIK3CA	E545K	2.88163	NA	SNV	missense
			ALK	L1080L	0.645465	NA	SNV	synonymous
			MET	M1?	0.290208	NA	SNV	missense
			ALK	L1198P	0.253855	NA	SNV	missense
32	68.8196	16	APC	Y1027C	0.168223	NA	SNV	missense
			APC	p.Asp1003fs	25.2843	NA	INDEL	indel
			APC	p.Thr1556fs	34.5147	NA	INDEL	indel
			BRAF	A762V	0.313391	NA	SNV	missense
			BRCA1	K654T	0.206553	NA	SNV	missense
			DDR2	R709R	0.705336	NA	SNV	synonymous
			KRAS	A146P	0.726888	NA	SNV	missense
			KRAS	AMP	0	2.91332	CNV	amp
			KRAS	G12V	48.2924	NA	SNV	missense
			PTEN	p.Thr319fs	40.4058	NA	INDEL	indel
			RET	S699P	0.113984	NA	SNV	missense
			SMAD4	R361C	52.323	NA	SNV	missense
			TP53	R248Q	0.14521	NA	SNV	missense
			TP53	p.Asn310fs	68.8196	NA	INDEL	indel
			TP53	p.Cys229fs	0.0286766	NA	INDEL	indel
			TP53	p.Leu201_Glu204del	0.0282221	NA	INDEL	indel
33	42.56	16	APC	Q1303*	42.5592	NA	SNV	nonsense
			BRAF	AMP	0	2.7144	CNV	amp
			CCNE1	AMP	0	2.24086	CNV	amp
			CDK4	AMP	0	2.3863	CNV	amp
			CDK6	AMP	0	2.79257	CNV	amp
			EGFR	AMP	0	2.68181	CNV	amp
			FGFR1	AMP	0	2.71119	CNV	amp
			GATA3	L417L	0.109258	NA	SNV	synonymous
			KRAS	AMP	0	2.31447	CNV	amp
			KRAS	G13D	19.4069	NA	SNV	missense
			MET	AMP	0	2.47078	CNV	amp
			MYC	AMP	0	2.48917	CNV	amp
			PIK3CA	E726K	0.269545	NA	SNV	missense
			RB1	R787*	0.182546	NA	SNV	nonsense
			SMAD4	A85P	22.3705	NA	SNV	missense
			TP53	G245S	41.5988	NA	SNV	missense
